# Supplementary material for: Live imaging of muscle histolysis in Drosophila metamorphosis
Source: PubMed Central journal article supplement (PMC4855724; doi:10.1186/s12861-016-0113-1), 2016-05-04
Supplement: 12861_2016_113_MOESM1_ESM.pdf [file 12861_2016_113_MOESM1_ESM.pdf]

| Gene perturbed                                              | Biological function              | Gene perturbation Type | Construct/ TRip #                          | Stock Number | Prepupae scored | Lethality Stage | Eclosion [%] | Flightless rate [%] |
|-------------------------------------------------------------|----------------------------------|------------------------|--------------------------------------------|--------------|-----------------|-----------------|--------------|---------------------|
| <b>7B2</b>                                                  | Proteolysis, peptidase activator | RNAi                   | UAS-7B2-lhRNA (Long Hairpin JF02917)       | B-27989      | 20              | PP 5%           | 95%          | 0%                  |
| <b>Activator of SUMO 1 (Aos1)</b>                           | Protein sumoylation              | RNAi                   | UAS-Aos1-shRNA (Short Hairpin GL00493)     | B-36074      | 20              | LP 25%          | 75%          | 0%                  |
| <b>Adenosine deaminase acting on RNA (Adar)</b>             | RNA editing                      | RNAi                   | UAS-Adar-lhRNA (Long Hairpin JF02942)      | B-28311      | 20              |                 | 100%         | 0%                  |
| <b>Akt1</b>                                                 | Cell growth, organ size          | Protein OE             | UAS-Akt1                                   | B-8191       | 15              |                 | 100%         | 0%                  |
| <b>Akt1</b>                                                 | Cell growth, organ size          | RNAi                   | UAS-Akt1-lhRNA (Long Hairpin HM04007)      | B-31701      | 20              | LP 35%          | 65%          | partial             |
| <b>Akt1</b>                                                 | Cell growth, organ size          | RNAi                   | UAS-Akt1-shRNA (Short Hairpin HMS00007)    | B-33615      | 0               | BP 100%         | 0%           | n.d.                |
| <b>ALG-2 interacting protein X (ALiX)</b>                   | Ubiquitin dependent proteolysis  | RNAi                   | UAS-ALiX-shRNA (Short Hairpin HMS00298)    | B-33417      | 20              |                 | 100.0%       | n.d.                |
| <b>AMP-activated protein kinase alpha (AMPKalpha)/SNF1A</b> | Protein kinase                   | RNAi                   | UAS-AMPKalpha-lhRNA (Long Hairpin JF01951) | B-35137      | 20              |                 | 90.0%        | yes                 |
| <b>Atrophin (Atro)/Grunge</b>                               | Atrophin homolog                 | RNAi                   | UAS-Grunge-shRNA (Short Hairpin HMS00756)  | B-32961      | 20              |                 | 95%          | yes                 |
| <b>Autophagy-related-1 (Atg1)</b>                           | Autophagy                        | RNAi                   | UAS-Atg1-shRNA (GL00047)                   | B-35177      | 20              |                 | 100.0%       | n.d.                |
| <b>Autophagy-related-10 (Atg10)</b>                         | Autophagy                        | RNAi                   | UAS-Atg10-shRNA (Short Hairpin HMS02026)   | B-40859      | 20              |                 | 100%         | n.d.                |
| <b>Autophagy-related-101 (Atg101)</b>                       | Autophagy                        | RNAi                   | UAS-Atg101-shRNA (Short Hairpin HMS01349)  | B-34360      | 20              |                 |              | n.d.                |
| <b>Autophagy-related-12 (Atg12)</b>                         | Autophagy                        | RNAi                   | UAS-Atg12-RNAi (Short Hairpin HMS01153)    | B-34675      | 20              | EP 5%           | 95%          | 0%                  |
| <b>Autophagy-related-13 (Atg13)</b>                         | Autophagy                        | RNAi                   | UAS-Atg13-shRNA *Short Hairpin HMS02028)   | B-40861      | 20              |                 |              | n.d.                |
| <b>Autophagy-related-14 (Atg14)</b>                         | Autophagy                        | RNAi                   | UAS-Atg14-shRNA (Short Hairpin HMS02025)   | B-40858      | 20              | PP 5%, LP 15%   | 80%          | 50%                 |
| <b>Autophagy-related-16 (Atg16)</b>                         | Autophagy                        | RNAi                   | UAS-Atg16-shRNA (Short Hairpin HMS01347)   | B-34358      | 20              |                 |              | n.d.                |

| Gene perturbed                                                       | Biological function                 | Gene perturbation Type | Construct/ TRip #                            | Stock Number | Prepupae scored | Lethality Stage | Eclosion [%] | Flightless rate [%] |
|----------------------------------------------------------------------|-------------------------------------|------------------------|----------------------------------------------|--------------|-----------------|-----------------|--------------|---------------------|
| <b>Autophagy-related-17 (Atg17)</b>                                  | Autophagy                           | RNAi                   | UAS-Atg17-shRNA (Short Hairpin HMS01611)     | B-36918      | 20              |                 |              | n.d.                |
| <b>Autophagy-related-18 (Atg18)</b>                                  | Autophagy                           | RNAi                   | UAS-Atg18-shRNA (Short Hairpin HMS01193)     | B-34714      | 20              |                 | 100%         | 0%                  |
| <b>Autophagy-related-2 (Atg2)</b>                                    | Autophagy                           | RNAi                   | UAS-Atg2-shRNA (Short Hairpin HMS01198)      | B-34719      | 0               | BP 100%         | 0%           | n.d.                |
| <b>Autophagy-related-4a (Atg4a)</b>                                  | Autophagy                           | RNAi                   | UAS-Atg4-shRNA (Short Hairpin HMS01482)      | B-35740      | 20              | LP 2%           | 98%          | 78%                 |
| <b>Autophagy-related-5 (Atg5)</b>                                    | Autophagy                           | RNAi                   | UAS-Atg5-shRNA (Short Hairpin HMS01244)      | B-34899      | 20              |                 | 100%         | 0%                  |
| <b>Autophagy-related-6 (Atg6)</b>                                    | Autophagy                           | RNAi                   | UAS-Atg6-shRNA (Short Hairpin HMS01483)      | B-35741      | 20              | LP 2%           | 98%          | 0%                  |
| <b>Autophagy-related-7 (Atg7)</b>                                    | Autophagy                           | RNAi                   | UAS-Atg7-shRNA (Short Hairpin HMS01358)      | B-34369      | 20              |                 | 100%         | 0%                  |
| <b>Autophagy-related-8a (Atg8a)</b>                                  | Autophagy                           | RNAi                   | UAS-Atg8a-shRNA (Short Hairpin HMS01328)     | B-34340      | 20              |                 | 100%         | 0%                  |
| <b>Autophagy-related-8b (Atg8b)</b>                                  | Autophagy                           | RNAi                   | UAS-Atg8b-shRNA (Short Hairpin HMS01245)     | B-34900      | 20              |                 | 100%         | 0%                  |
| <b>Autophagy-related-9 (Atg9)</b>                                    | Autophagy                           | RNAi                   | UAS-Atg9-shRNA (Short Hairpin HMS01246)      | B-34901      | 20              |                 | 100%         | 0%                  |
| <b>bent (bt)</b>                                                     | sarcomere organization              | RNAi                   | UAS-bt-lhrRNA (Long Hairpin JF01108)         | B-31546      | 0               | larval          | 0%           | n.d.                |
| <b>beta subunit of type I geranylgeranyl transferase (betaggt-I)</b> | Protein prenylation, RAS signalling | RNAi                   | UAS-betaggt-I-shRNA (Short Hairpin HMS01165) | B-34687      | 20              |                 | 100%         | 0%                  |
| <b>Bruce</b>                                                         | apoptosis                           | RNAi                   | UAS-dBruce-RNAi                              | VDRC 107620  | 14              |                 | 100%         | 0%                  |
| <b>Bruce</b>                                                         | apoptosis                           | RNAi                   | UAS-dBruce-RNAi                              | VDRC 48309   | 20              |                 | 95%          | 0%                  |
| <b>Cadherin 99C (Cad99C)</b>                                         | Cell adhesion                       | RNAi                   | UAS-Cad99C-lhrRNA (Long Hairpin JF02660)     | B-27510      | 20              | LP 5%           | 95%          | 0%                  |
| <b>Cadherin 99C (Cad99C)</b>                                         | Cell adhesion                       | RNAi                   | UAS-Cad99c-shRNA (Short Hairpin HMS01451)    | B-35037      | 20              | LP 10%          | 90%          | 0%                  |

| Gene perturbed                                           | Biological function                   | Gene perturbation Type | Construct/ TRip #                            | Stock Number | Prepupae scored | Lethality Stage | Eclosion [%] | Flightless rate [%] |
|----------------------------------------------------------|---------------------------------------|------------------------|----------------------------------------------|--------------|-----------------|-----------------|--------------|---------------------|
| <b>cAMP-dependent protein kinase 1 (Pka-C1)</b>          | protein kinase                        | RNAi                   | UAS-Pka-C1-shRNA<br>(Short Hairpin GL00038)  | B-35169      | 20              |                 | 100%         | 0%                  |
| <b>Catalase (Cat)</b>                                    | Heart morphogenesis                   | RNAi                   | UAS-Cat-shRNA<br>(Short Hairpin HMS00990)    | B-34020      | 20              |                 | 90%          | 0%                  |
| <b>cathD</b>                                             | autophagic cell death, proteolysis    | RNAi                   | UAS-cathD-lhrRNA<br>(Long Hairpin HM05189)   | B-28978      | 15              |                 | 100%         | 0%                  |
| <b>CG13579</b>                                           | G-protein couples receptor            | RNAi                   | UAS-CG13579-lhrRNA<br>(Long Hairpin JF03059) | B-28644      | 20              |                 | 100%         | 0%                  |
| <b>chico</b>                                             | Cell size, proliferation              | RNAi                   | UAS-chico-shRNA<br>(Short Hairpin HMS01553)  | B-36665      | 20              |                 | 95%          | 0%                  |
| <b>chico</b>                                             | Cell size, proliferation              | RNAi                   | UAS-chico-shRNA<br>(Short Hairpin GL00525)   | B-36788      | 20              |                 | 95%          | 0%                  |
| <b>Chro (Chromator)</b>                                  | Interacts with EAST                   | RNAi                   | UAS-Chro-shRNA<br>(Short Hairpin GL00503)    | B-36084      | 30              | LP 2%           | 97%          | 0%                  |
| <b>coracle (cora)</b>                                    | actin cytoskeleton, heart development | RNAi                   | UAS-cora-shRNA<br>(Short Hairpin HMS01413)   | B-35003      | 20              |                 | 100%         | no                  |
| <b>Cysteine Proteinase 1 (Cp1)</b>                       | autophagic cell death                 | RNAi                   | UAS-Cp1-shRNA<br>(Short Hairpin HMS02336)    | B-41939      | 20              |                 | 100%         | 0%                  |
| <b>Cysteine Proteinase 1 (Cp1)</b>                       | autophagic cell death                 | RNAi                   | UAS-Cp1-shRNA<br>(Short Hairpin HMS00725)    | B-32932      | 20              | LP 5%           | 95%          | 0%                  |
| <b>dawdle</b>                                            | Myostatin homolog                     | RNAi                   | UAS-dawdle-shRNA<br>(Short Hairpin HMS01110) | B-34974      | 20              |                 |              |                     |
| <b>death executioner Bcl-2 homologue (debcl)</b>         | apoptosis                             | RNAi                   | UAS-debcl-lhrRNA<br>(Long Hairpin JF02429)   | B-27083      | 20              |                 | 100%         | 0%                  |
| <b>Death-associated inhibitor of apoptosis 2 (Diap2)</b> | apoptosis                             | RNAi                   | UAS-Diap2-shRNA<br>(Short Hairpin HMS00085)  | B-34476      | 20              |                 |              | no                  |
| <b>defective proboscis extension response 5 (dpr5)</b>   | unknown                               | RNAi                   | UAS-dpr5-lhrRNA<br>(Long Hairpin JF03306)    | B-29627      | 20              | PP 5%, LP 5%    | 90%          | 0%                  |
| <b>Drosophila inhibitor of apoptosis 1 (Diap1)</b>       | negative regulator of apoptosis       | Protein OE             | UAS-Diap1                                    | B-6657       | 20              |                 | 100%         | 0%                  |
| <b>Drosophila inhibitor of apoptosis 1 (Diap1)</b>       | Apoptosis                             | RNAi                   | UAS-Diap1-shRNA<br>(Short Hairpin HMS00752)  | B-33957      | 20              |                 |              | n.d.                |

| Gene perturbed                                                   | Biological function                                        | Gene perturbation Type | Construct/ TRip #                               | Stock Number | Prepupae scored | Lethality Stage            | Eclosion [%] | Flightless rate [%] |
|------------------------------------------------------------------|------------------------------------------------------------|------------------------|-------------------------------------------------|--------------|-----------------|----------------------------|--------------|---------------------|
| <b>east</b>                                                      | Cell death, delays cell death of salivary glands & muscles | Protein OE             | UAS-eastN2(1-1520)-GFP                          | MW           | 40              |                            | 98%          | 0%                  |
| <b>east</b>                                                      | Cell death, delays cell death of salivary glands & muscles | Protein OE             | UAS-eastN1(1-1902)-GFP                          | MW           | 46              |                            | 65%          | 100%                |
| <b>east</b>                                                      | Cell death, delays cell death of salivary glands & muscles | RNAi                   | UAS-east-shRNA<br>Short Hairpin HMS00816)       | B-33879      | 0               | BP+PP<br>100%              | 0%           | n.d.                |
| <b>Ecdysone Receptor (EcR)</b>                                   | Master regulator of metamorphosis                          | RNAi                   | UAS-EcR-RNAi                                    | B-9326       | 1               | BP+PP<br>100%              | 0%           | n.d.                |
| <b>Ecdysone-induced protein 63E (Eip63E)</b>                     | Metamorphosis                                              | RNAi                   | UAS-Epi63E-shRNA,<br>Short Hairpin HMS00569)    | B-34075      | 20              | EP 20%                     | 80%          | 0%                  |
| <b>Endophilin B (EndoB)</b>                                      | Membrane organization                                      | RNAi                   | UAS-EndoB-shRNA<br>(Short Hairpin HMS01285)     | B-34935      | 20              |                            |              | n.d.                |
| <b>escargot (esg)</b>                                            | Transcription factor                                       | RNAi                   | UAS-esg-shRNA<br>(Short Hairpin HMS00025)       | B-34063      | 20              | LP 35%                     | 65%          | partial             |
| <b>forkhead box, sub-group O (foxo)</b>                          | insulin receptor signalling, muscle atrophy                | Protein OE             | UAS-foxo                                        | B-9575       | 0               | BP+PP<br>100%              | 0%           | n.d.                |
| <b>forkhead box, sub-group O (foxo)</b>                          | insulin receptor signalling, muscle atrophy                | RNAi                   | UAS-foxo-shRNA<br>(Short Hairpin HMS00422)      | B-32427      | 20              |                            |              | n.d.                |
| <b>GXIVsPla2</b>                                                 | phospholipase A2                                           | RNAi                   | UAS-GXIVsPLA2-shRNA<br>(Short Hairpin HMS00918) | B-33961      | 34              | PP 9%, EP<br>26%,<br>LP44% | 21%          | 100%                |
| <b>happyhour (hppy)</b>                                          | Cell death, size and growth                                | RNAi                   | UAS-hppy-shRNA<br>(Short Hairpin GL00185)       | B-35284      | 20              |                            | 100%         | 0%                  |
| <b>Heterogeneous nuclear ribonucleoprotein at 98DE (Hrb98DE)</b> | mRNA splicing                                              | RNAi                   | UAS-Hrb98DE-shRNA<br>(Short Hairpin HMS00342)   | B-32351      | 20              | EP 25%,<br>LP 40%          | 35%          | 100%                |
| <b>hippo (hpe)</b>                                               | Hippo pathway, organ-size, proliferation                   | RNAi                   | UAS-Hippo-RNAi                                  | 33614        |                 |                            |              | 0%                  |

| Gene perturbed                                                   | Biological function                            | Gene perturbation Type | Construct/ TRip #                          | Stock Number | Prepupae scored | Lethality Stage       | Eclosion [%] | Flightless rate [%] |
|------------------------------------------------------------------|------------------------------------------------|------------------------|--------------------------------------------|--------------|-----------------|-----------------------|--------------|---------------------|
| <b>hippo (hpo)</b>                                               | Hippo pathway, organ size, proliferation       | RNAi                   | UAS-hpo-shRNA (Short Hairpin GL00046)      | B-35176      | 20              |                       | 100%         | 0%                  |
| <b>immune response deficient 1 (ird1)</b>                        | Autophagy                                      | RNAi                   | UAS-ird1-shRNA (Short Hairpin GL00085)     | B-35209      | 20              |                       |              | 0%                  |
| <b>Insulin-like receptor (InR)</b>                               | cell survival, body and organ size             | RNAi                   | UAS-InR-shRNA (Short Hairpin GL00139)      | B-35251      | 20              | PP 5%, EP 80%, LP 10% | 5%           | yes                 |
| <b>Lola-like (lolal)</b>                                         | chromatin silencing                            | RNAi                   | UAS-lolal-shRNA (Short Hairpin GLV21087)   | B-35722      | 20              | LP 5%                 | 95%          | 0%                  |
| <b>Lst8</b>                                                      | Cell size, TOR signalling                      | RNAi                   | UAS-Lst8-shRNA (Short Hairpin HMS01350)    | B-34361      | 20              |                       |              |                     |
| <b>Megator (Mtor)</b>                                            | mitosis, chromatin, nuclear pore complex       | RNAi                   | UAS-Mtor-shRNA (Short Hairpin HMS00735)    | B-32941      | 0               | BP+PP 100%            | 0%           | n.d.                |
| <b>misfire (mfr)</b>                                             | Ferlin domain                                  | RNAi                   | UAS-mfr-shRNA (Short Hairpin GLV21054)     | B-35689      | 20              | LP 25%                | 75%          | No                  |
| <b>modifier of rpr and grim, ubiquitously expressed (morgue)</b> | cell death                                     | RNAi                   | UAS-morgue-RNAi                            | VDRC 11090   | 15              | LP 7%                 | 93%          | 0%                  |
| <b>Molecule interacting with CasL (Mical)</b>                    | sarcomere organization, actin depolymerization | RNAi                   | UAS-Mical-lhRNA (Long Hairpin JF01625)     | B-31148      | 20              |                       | 100%         | No                  |
| <b>Msp300 (Muscle specific protein 300)</b>                      | muscle differentiation                         | RNAi                   | UAS-Msp300-shRNA (Short Hairpin HMS00368)  | B-32377      | 20              |                       |              | n.d.                |
| <b>Muscle protein 20 (Mp20)</b>                                  | muscle differentiation                         | RNAi                   | UAS-Mp20-shRNA (Short Hairpin HMS00630)    | B-34963      | 20              |                       |              | n.d.                |
| <b>muscleblind (mbi)</b>                                         | muscle development                             | RNAi                   | UAS-mbi-lhRNA (Long Hairpin JF03264)       | B-29585      | 20              |                       |              | n.d.                |
| <b>Myo31DF (Myosin 31DF)</b>                                     | movement of organelles                         | RNAi                   | UAS-Myo31DF-shRNA (Short Hairpin HMS00928) | B-33971      | 20              |                       | 100%         | 0%                  |
| <b>myotubularin (mtm)</b>                                        | myotubularin                                   | RNAi                   | UAS-mtm-shRNA (Short Hairpin HMS01806)     | B-38339      | 20              |                       |              | n.d.                |
| <b>p53</b>                                                       | cell death                                     | RNAi                   | UAS-p53-shRNA (Short Hairpin GL01032)      | B-36814      | 21              |                       | 100%         | 0%                  |
| <b>p53</b>                                                       | cell death                                     | RNAi                   | UAS-p53-shRNA (Short Hairpin HMS02286)     | B-41720      | 20              | EP 5%                 | 95%          | 0%                  |

| Gene perturbed                                         | Biological function          | Gene perturbation Type | Construct/ TRip #                         | Stock Number | Prepupae scored | Lethality Stage | Eclosion [%] | Flightless rate [%] |
|--------------------------------------------------------|------------------------------|------------------------|-------------------------------------------|--------------|-----------------|-----------------|--------------|---------------------|
| <b>pelle (pll)</b>                                     | cell death                   | RNAi                   | UAS-pll-shRNA (Short Hairpin HMS01213)    | B-34733      | 20              |                 | 100%         | 0%                  |
| <b>pelle (pll)</b>                                     | cell death                   | RNAi                   | UAS-pll-shRNA (Short Hairpin GL00150)     | B-35577      | 20              |                 | 100%         | 0%                  |
| <b>Phosphofructokinase (Pfk)</b>                       | Metabolism                   | RNAi                   | UAS-Pfk-shRNA (Short Hairpin GL00298)     | B-36782      | 20              |                 | 100%         | 0%                  |
| <b>Phosphofructokinase (Ppfk)</b>                      | Metabolism                   | RNAi                   | UAS-Pfk-shRNA (Short Hairpin HMS01324)    | B-34336      | 4               | few prepupae    | 100%         | 100%                |
| <b>Phosphatidylinositol 3 kinase 59F (Pi3K59F)</b>     | autophagy                    | RNAi                   | UAS-Pi3K59F-shRNA (Short Hairpin GL00175) | B-36056      | 20              |                 |              | n.d.                |
| <b>Polycomblike (Pcl)</b>                              | Transcription factor         | RNAi                   | UAS-Pcl-shRNA (Short Hairpin HMS00897)    | B-33946      | 20              |                 | 100%         | 0%                  |
| <b>Rac1</b>                                            | Muscle cell differentiation  | Protein OE (CA)        | UAS-Rac1.V12                              | B-6291       | 0               | BP 100%         | 0%           | n.d.                |
| <b>Rac1</b>                                            | Muscle cell differentiation  | Protein OE (DN)        | UAS-Rac1.N17                              | B-6292       | 10              | EP 50%, LP 17%  | 33%          | 100%                |
| <b>rapamycin-insensitive companion of Tor (rictor)</b> | TOR pathway                  | RNAi                   | UAS-rictor-shRNA (Short Hairpin GL00544)  | B-36584      | 20              | LP 5%           | 95%          | 33%                 |
| <b>rapamycin-insensitive companion of Tor (rictor)</b> | TOR pathway                  | RNAi                   | UAS-rictor-shRNA (Short Hairpin HMS01588) | B-36699      | 20              |                 | 100%         | 0%                  |
| <b>Ras</b>                                             | cell death and proliferation | Protein OE (DN)        | UAS-Ras.N17                               | B-4846       | 20              |                 | 100%         | 0%                  |
| <b>Ras homolog enriched in brain ortholog (Rheb)</b>   | TOR pathway                  | Protein OE             | UAS-Rheb (3rd)                            | B-9689       | 15              |                 | 100%         | 100%                |
| <b>Ras homolog enriched in brain ortholog (Rheb)</b>   | TOR pathway                  | RNAi                   | UAS-Rheb-shRNA (Short Hairpin HMS00923)   | B-33966      | 32              | LP 19%          | 81%          | 100%                |
| <b>Ras oncogene at 64B (Ras64B)</b>                    | cell death and proliferation | Protein OE (CA)        | UAS-Ras64B.V14                            | B-2025       | 9               |                 | 100%         | 100%                |
| <b>Ras oncogene at 85D (Ras85D)</b>                    | cell death and proliferation | Protein OE             | UAS-Ras85D                                | B-5788       | 20              |                 | 100%         | 0%                  |

| Gene perturbed                                                    | Biological function                          | Gene perturbation Type | Construct/ TRip #                                | Stock Number | Prepupae scored | Lethality Stage       | Eclosion [%] | Flightless rate [%] |
|-------------------------------------------------------------------|----------------------------------------------|------------------------|--------------------------------------------------|--------------|-----------------|-----------------------|--------------|---------------------|
| <b>Ras85D</b>                                                     | cell death and proliferation                 | Protein OE (CA)        | UAS-Ras.V12                                      | B-4847       | 0               | BP 100%               | 0%           | n.d.                |
| <b>Ras85D</b>                                                     | cell death and proliferation                 | Protein OE (DN)        | UAS-Ras85D.N17                                   | B-4845       | 20              |                       | 100%         | 0%                  |
| <b>reaper (rpr)</b>                                               | cell death                                   | Protein OE             | UAS-rpr                                          | B-5824       | 0               | BP 100%               | 0%           | n.d.                |
| <b>Rho1</b>                                                       | actin cytoskeleton                           | Protein OE (DN)        | UAS-Rho1.N19                                     | B-7328       | 10              | LP 70%                | 30%          | 0%                  |
| <b>Rm62</b>                                                       | RNA interference, RNA helicase               | RNAi                   | UAS-Rm62-shRNA<br>(Short Hairpin HMS00144)       | B-34829      | 54              | PP 6%, EP 2%, LP 54%  | 39%          | 100%                |
| <b>RPS6-p70-protein kinase (S6k)</b>                              | protein translation                          | RNAi                   | UAS-S6k-shRNA<br>(Short Hairpin GL01327)         | B-41895      | 20              |                       |              | n.d.                |
| <b>salvador</b>                                                   | Hippo pathway, organ size, proliferation     | RNAi                   | UAS-salvador-shRNA<br>(Short Hairpin HMS00760)   | B-32965      | 20              |                       |              | 0%                  |
| <b>scarface (scaf)</b>                                            | proteolysis                                  | RNAi                   | UAS-scaf-lhRNA<br>(Long Hairpin JF03318)         | B-29386      | 20              |                       | 100%         | 0%                  |
| <b>seizure (sei)</b>                                              | potassium channel                            | RNAi                   | UAS-sei-lhRNA<br>(Long Hairpin JF01474)          | B-31681      | 20              |                       | 100%         | 0%                  |
| <b>Skeletor</b>                                                   | spindle matrix                               | RNAi                   | UAS-Skeletor-lhRNA<br>(Long Hairpin JF01407)     | B-31622      | 20              |                       | 100%         | 0%                  |
| <b>small ribonucleoprotein particle U1 subunit C (snRNP-U1-C)</b> | mRNA splicing                                | RNAi                   | UAS-snRNP-U1-C-shRNA<br>(Short Hairpin HMS00137) | B-34822      | 0               | BP 100%               | 0%           | n.d.                |
| <b>spalt-major (salm)</b>                                         | Muscle cell differentiation, myofibre switch | RNAi                   | UAS-salm-RNAi<br>(Short Hairpin HMS00594)        | B-33714      | 20              |                       | 100%         | 0%                  |
| <b>Target of rapamycin (TOR)</b>                                  | TOR pathway, cell size control               | Protein OE             | UAS-TOR                                          | B-7012       | 20              | PP 85%, EP 10%, LP 5% | 0%           | n.d.                |
| <b>Target of rapamycin (TOR)</b>                                  | TOR pathway, cell size control               | Protein OE (DN)        | UAS-TOR-TED                                      | B-7013       | 51              | 22% EP, 27% LP        | 51%          | 20%                 |
| <b>Target of rapamycin (TOR)</b>                                  | TOR pathway, cell size control               | RNAi                   | UAS-TOR-shRNA<br>(Short Hairpin GL00156)         | B-35578      | 20              | LP 20%                | 80%          | partial (29%)       |

| Gene perturbed                                               | Biological function                            | Gene perturbation Type | Construct/ TRip #                         | Stock Number | Prepupae scored | Lethality Stage       | Eclosion [%] | Flightless rate [%] |
|--------------------------------------------------------------|------------------------------------------------|------------------------|-------------------------------------------|--------------|-----------------|-----------------------|--------------|---------------------|
| <b>Target of rapamycin (TOR)</b>                             | TOR pathway, cell size control                 | RNAi                   | UAS-TOR-shRNA (Short Hairpin HMS01114)    | B-34369      | 20              |                       | 100%         | 0%                  |
| <b>Target of rapamycin (TOR)</b>                             | TOR pathway, cell size control                 | RNAi                   | UAS-TOR-shRNA (Short Hairpin HMS00904)    | B-33951      | 7               | PP 100%               | 0%           | n.d.                |
| <b>target of rapamycin (TOR)-associated protein (raptor)</b> | TOR signalling                                 | RNAi                   | UAS-raptor-shRNA (Short Hairpin HMS00124) | B-34814      | 15              | PP 100%               | 0%           | n.d.                |
| <b>terribly reduced optic lobes (trol)</b>                   |                                                | RNAi                   | UAS-trol-shRNA (Short Hairpin GL01153)    | B-42783      | 20              |                       |              | n.d.                |
| <b>thin, another B-box affiliate (tn)</b>                    | muscle development                             | RNAi                   | UAS-tn-shRNA (Short Hairpin HMS02508)     | B-42826      | 20              |                       |              | 0%                  |
| <b>Tsc1</b>                                                  | TOR pathway, cell size control                 | RNAi                   | UAS-Tsc1-shRNA (Short Hairpin GL00012)    | B-35144      | 20              |                       | 80%          | 22%                 |
| <b>Tsc2, gigas (gig)</b>                                     | TOR pathway, cell size control                 | RNAi                   | UAS-Tsc2-shRNA (Short Hairpin HMS01217)   | B-34737      | 20              | PP 20%, EP 5%, LP 15% | 60%          | 64%                 |
| <b>Tsc2, gigas (gig)</b>                                     | TOR pathway, cell size control                 | RNAi                   | UAS-Tsc2-shRNA (Short Hairpin GL00321)    | B-35401      | 21              |                       | 100%         | 6%                  |
| <b>Ubiquitin conjugating enzyme (UbcD6)</b>                  | Proteolysis                                    | RNAi                   | UAS-UbcD6-shRNA (Short Hairpin GL00405)   | B-35476      | 20              | LP 5%                 | 95%          | 0%                  |
| <b>Unc-89</b>                                                | sarcomere organization, muscle differentiation | RNAi                   | UAS-Unc-89-shRNA (Short Hairpin HMS00963) | B-34000      | 20              |                       | 100%         | 0%                  |
| <b>UV-resistance associated gene (UVRAG)</b>                 | Autophagy, Cell growth                         | RNAi                   | UAS-Uvrag-shRNA (Short Hairpin HMS01357)  | B-34368      | 20              |                       |              | n.d.                |
| <b>warts (wts)</b>                                           | Hippo pathway, organ size, proliferation       | RNAi                   | UAS-wts-shRNA (Short Hairpin HMS00026)    | B-34064      | 20              |                       | 100%         | 0%                  |
| <b>yorkie (yki)</b>                                          | Hippo pathway, organ size, proliferation       | RNAi                   | UAS-yki-shRNA (Short Hairpin HMS00041)    | B-34067      | 15              | LP 7%                 | 93%          | 100%                |
