# Supplementary material for: Live imaging of muscle histolysis in Drosophila metamorphosis
Source: PubMed Central journal article supplement (PMC4855724; doi:10.1186/s12861-016-0113-1), 2016-05-04
Supplement: 12861_2016_113_MOESM2_ESM.pdf [file 12861_2016_113_MOESM2_ESM.pdf]

(A) Prepupa

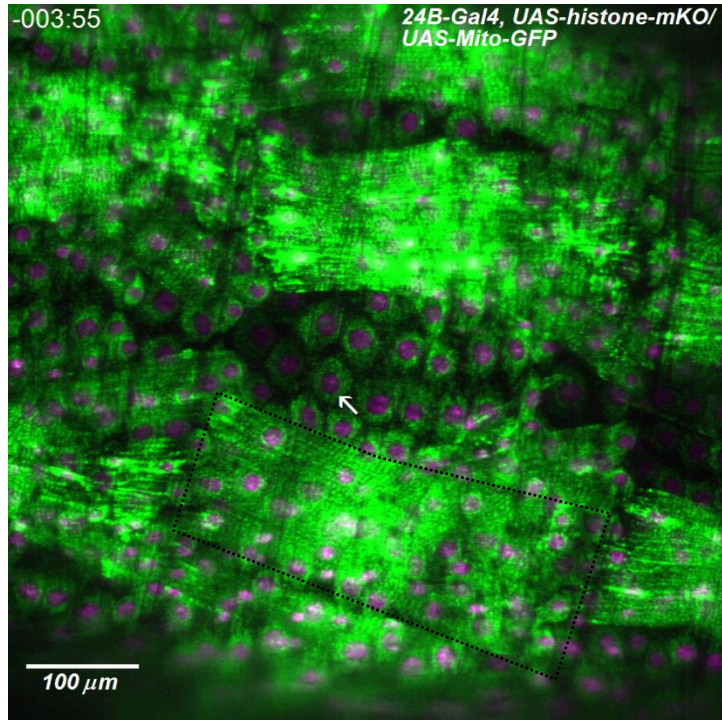

(B) Pupa

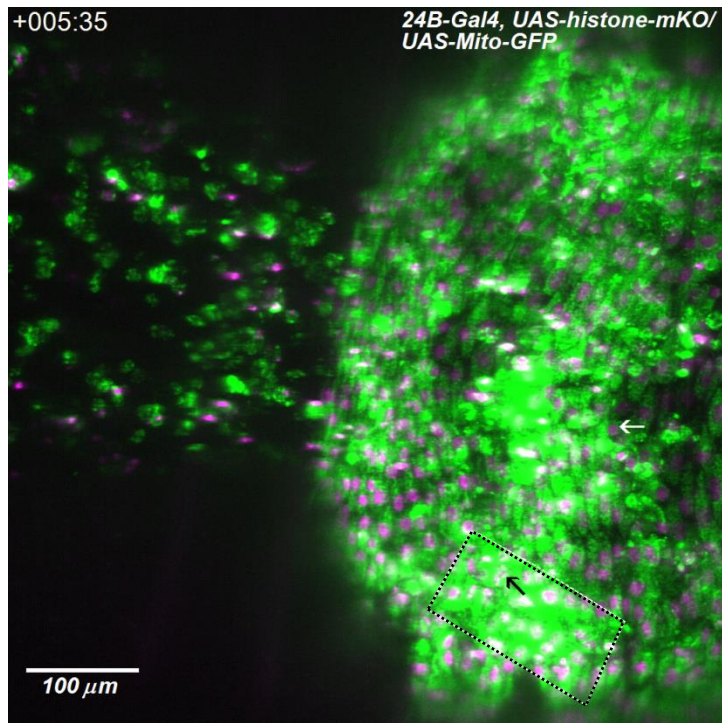

Additional File 2: Figure S1. Expression of the 24B-GAL4 driver in metamorphosis.
