# Supplementary material for: Live imaging of muscle histolysis in Drosophila metamorphosis
Source: PubMed Central journal article supplement (PMC4855724; doi:10.1186/s12861-016-0113-1), 2016-05-04
Supplement: 12861_2016_113_MOESM3_ESM.pdf [file 12861_2016_113_MOESM3_ESM.pdf]

(A) Prepupa

(B) Pupa, day 2

*Cp1*-shRNA  
(HMS02336)

*Cp1*-shRNA  
(HMS00725)

control-  
shRNA

*Mef2-GAL4; UAS-Cp1-mKO2*

500  $\mu$ m

**Additional file 3: Figure S2. Two different *Cp1*-shRNAs repress expression of a *Cp1*-mKO2 reporter during prepupal and pupal stages.**
